# Supplementary material for: Polymorph selection in 2D crystals by phase transition blocking
Source: Royal Society of Chemistry journal article supplement (doi:10.1039/b911056a), 2009-01-01
Supplement: b911056a.pdf [file b911056a.pdf]

Supporting Information

## Polymorph selection in 2D crystals by phase transition blocking

Leo Merz,<sup>a</sup> Tobias Bauert,<sup>a</sup> Manfred Parschau,<sup>a</sup> Georg Koller,<sup>a,S</sup> Jay S. Siegel,<sup>b</sup> and Karl-Heinz Ernst<sup>\*,a,b</sup>

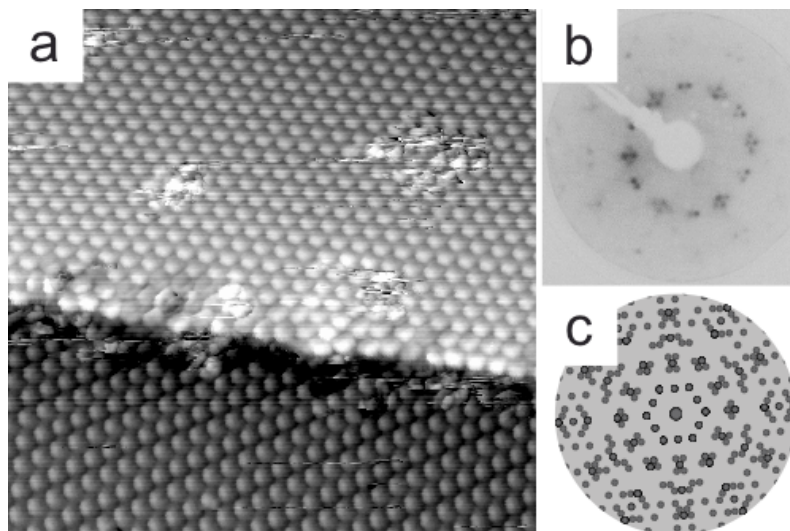

**Supporting Figure 1.** (a) 26 nm × 26 nm STM image showing the coexistence of polymorphs at 69K. Two copper terraces are covered with two different polymorphs. The phase boundary – running almost horizontally – coincides with a Cu substrate step. Upper terrace: polymorph II, lower terrace: polymorph III (STM parameters: –1.8 V, 200 pA). (b) LEED image of the conglomerate at 100 K with the simulated pattern shown in (c). The LEED pattern is equal to the superposition of the two LEED patterns of the pure polymorphs (see Fig. 2 b,c and f,g).
